# Supplementary material for: Genomic and phenotypic characterization of in vitro-generated Chlamydia trachomatis recombinants
Source: PubMed Central journal article supplement (PMC3703283; doi:10.1186/1471-2180-13-142), 2013-06-20

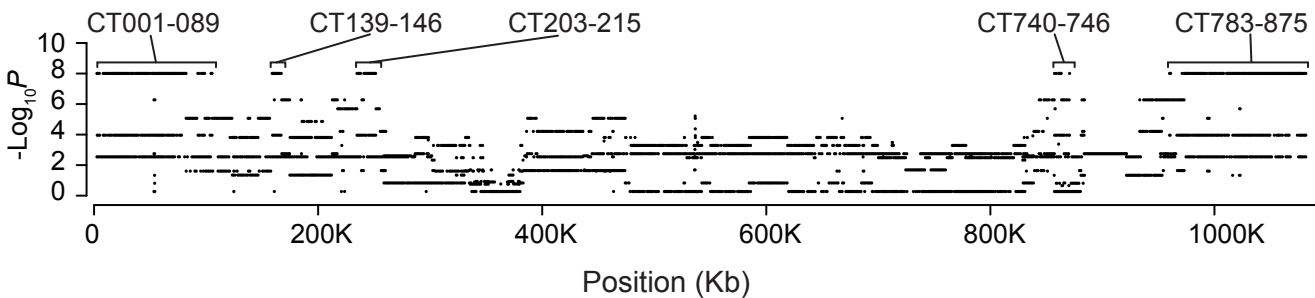

Supplement: 1471-2180-13-142-S1.pdf [file 1471-2180-13-142-S1.pdf]
