# Supplementary material for: Genomic and phenotypic characterization of in vitro-generated Chlamydia trachomatis recombinants
Source: PubMed Central journal article supplement (PMC3703283; doi:10.1186/1471-2180-13-142), 2013-06-20
Supplement: 1471-2180-13-142-S2.pdf [file 1471-2180-13-142-S2.pdf]

| D/UW3 locus | L2-434 locus | Gene product         | NS AA changes | Membrane protein          | Indels | Elongation/truncation |
|-------------|--------------|----------------------|---------------|---------------------------|--------|-----------------------|
| CT001       | CTL0256      | hypothetical protein | 2             | putative membrane protein |        |                       |
| CT005       | CTL0260      | hypothetical protein | 1             | putative membrane protein |        |                       |
| CT007       | CTL0262      | hypothetical protein | 2             | putative membrane protein |        |                       |
| CT010       | CTL0265      | htrB                 | 1             |                           |        |                       |
| CT011       | CTL0266      | hypothetical protein | 2             |                           |        |                       |
| CT012       | CTL0267      | hypothetical protein | 1             | putative membrane protein |        |                       |
| CT013       | CTL0268      | cydA                 | 4             | putative membrane protein |        |                       |
| CT014       | CTL0269      | cydB                 | 3             | putative membrane protein |        |                       |
| CT015       | CTL0270      | hypothetical protein | 1             |                           |        |                       |
| CT016       | CTL0271      | hypothetical protein | 2             |                           |        |                       |
| CT017       | CTL0272      | hypothetical protein | 3             | putative membrane protein |        |                       |
| CT018       | CTL0273      | hypothetical protein | 6             | putative membrane protein |        |                       |
| CT019       | CTL0274      | ileS                 | 5             |                           |        |                       |
| CT021       | CTL0276      | hypothetical protein | 1             | putative membrane protein |        |                       |
| CT022       | CTL0277      | rpmE                 | 1             |                           |        |                       |
| CT025       | CTL0280      | ffh                  | 1             |                           |        |                       |
| CT027       | CTL0282      | trmD                 | 1             |                           |        |                       |
| CT032       | CTL0287      | metG                 | 2             |                           |        |                       |
| CT034       | CTL0289      | hypothetical protein | 3             | putative membrane protein |        |                       |
| CT035       | CTL0290      | hypothetical protein | 1             |                           |        |                       |
| CT036       | CTL0291      | hypothetical protein | 20            | putative membrane protein | yes    | yes                   |
| CT040       | CTL0296      | ruvB                 | 1             |                           |        |                       |
| CT041       | CTL0297      | hypothetical protein | 1             |                           |        |                       |
| CT042       | CTL0298      | hypothetical protein | 3             |                           |        |                       |
| CT045       | CTL0301      | hypothetical protein | 2             |                           |        |                       |
| CT046       | CTL0302      | hct2                 | 5             |                           |        |                       |
| CT047       | CTL0303      | hypothetical protein | 1             |                           |        |                       |
| CT049       | CTL0305      | hypothetical protein | 30            |                           |        |                       |
| CT050       | CTL0306      | hypothetical protein | 19            | putative membrane protein | yes    |                       |
| CT051       | CTL0307      | hypothetical protein | 63            | putative membrane protein | yes    |                       |
| CT052       | CTL0308      | hemN                 | 1             |                           |        |                       |
| CT054       | CTL0310      | sucA                 | 6             |                           |        |                       |
| CT056       | CTL0312      | hypothetical protein | 1             |                           |        |                       |
| CT057       | CTL0313      | gcpE                 | 3             |                           |        |                       |
| CT058       | CTL0314      | hypothetical protein | 11            | putative membrane protein | yes    |                       |
| CT059       | CTL0315      | fer                  | 2             |                           |        |                       |
| CT060       | CTL0316      | flhA                 | 4             | putative membrane protein |        |                       |
| CT061       | CTL0317      | fliA                 | 1             |                           |        |                       |
| CT062       | CTL0318      | tyrS                 | 1             |                           |        |                       |
| CT063       | CTL0319      | gnd                  | 4             |                           |        |                       |
| CT065       | CTL0321      | hypothetical protein | 1             | putative membrane protein |        |                       |
| CT076       | CTL0332      | smpB                 | 1             |                           |        |                       |
| CT079       | CTL0335      | hypothetical protein | 1             | putative membrane protein |        |                       |
| CT082       | CTL0338      | hypothetical protein | 3             | putative membrane protein |        |                       |
| CT083       | CTL0338A     | hypothetical protein | 2             |                           |        |                       |
| CT087       | CTL0342      | malQ                 | 1             |                           |        |                       |
| CT089       | CTL0344      | copN                 | 5             | putative membrane protein |        |                       |
| CT140       | CTL0395      | hypothetical protein | 3             | putative membrane protein |        |                       |
| CT142       | CTL0397      | hypothetical protein | 8             | putative membrane protein |        |                       |
| CT143       | CTL0398      | hypothetical protein | 8             |                           |        |                       |
| CT144       | CTL0399      | hypothetical protein | 20            | putative membrane protein | yes    |                       |
| CT146       | CTL0401      | dnjI                 | 2             |                           |        |                       |
| CT205       | CTL0457      | pfkA                 | 2             |                           |        |                       |
| CT206       | CTL0458      | hypothetical protein | 1             |                           |        |                       |
| CT207       | CTL0459      | pfkA_2               | 2             |                           |        |                       |
| CT208       | CTL0460      | gseA                 | 2             | putative membrane protein |        |                       |
| CT209       | CTL0461      | leuS                 | 5             |                           |        |                       |
| CT210       | CTL0462      | hemL                 | 4             |                           |        |                       |

| D/UW3 locus | L2-434 locus | Gene product         | NS AA changes | Membrane protein          | Indels | Elongation/truncation |
|-------------|--------------|----------------------|---------------|---------------------------|--------|-----------------------|
| CT211       | CTL0463      | hypothetical protein | 1             |                           |        |                       |
| CT212       | CTL0464      | hypothetical protein | 2             |                           |        |                       |
| CT214       | CTL0466      | hypothetical protein | 5             | putative membrane protein |        |                       |
| CT215       | CTL0467      | dhnA                 | 3             |                           |        |                       |
| CT783       | CTL0152      | hypothetical protein | 2             |                           |        |                       |
| CT784       | CTL0153      | rnpA                 | 1             |                           |        |                       |
| CT795       | CTL0164      | hypothetical protein | 1             |                           |        |                       |
| CT796       | CTL0165      | glyQ                 | 2             |                           |        |                       |
| CT798       | CTL0167      | glgA                 | 2             |                           |        |                       |
| CT799       | CTL0168      | rplY                 | 1             |                           |        |                       |
| CT804       | CTL0173      | ispE                 | 1             |                           |        |                       |
| CT806       | CTL0175      | ptr                  | 2             | putative membrane protein | yes    |                       |
| CT807       | CTL0176      | plsB                 | 1             |                           | yes    |                       |
| CT808       | CTL0177      | cafE                 | 1             |                           |        |                       |
| CT809       | CTL0178      | hypothetical protein | 7             |                           | yes    | yes                   |
| CT812       | CTL0183      | pmpD                 | 2             | membrane protein          | yes    |                       |
| CT813       | CTL0184      | hypothetical protein | 12            | putative membrane protein |        |                       |
| CT815       | CTL0187      | hypothetical protein | 3             |                           |        |                       |
| CT816       | CTL0188      | glmS                 | 4             |                           |        |                       |
| CT817       | CTL0189      | tyrP                 | 2             | putative membrane protein |        |                       |
| CT818       | CTL0190      | hypothetical protein | 2             | putative membrane protein |        |                       |
| CT820       | CTL0192      | ftsY                 | 1             |                           |        |                       |
| CT821       | CTL0193      | sucC                 | 4             | putative membrane protein |        |                       |
| CT823       | CTL0195      | htrA                 | 3             |                           |        |                       |
| CT824       | CTL0196      | hypothetical protein | 4             |                           |        |                       |
| CT825       | CTL0197      | rnuC                 | 4             | putative membrane protein |        |                       |
| CT826       | CTL0198      | pssA                 | 1             | putative membrane protein |        |                       |
| CT827       | CTL0199      | nrdA                 | 7             |                           |        |                       |
| CT828       | CTL0200      | nrdB                 | 1             | putative membrane protein |        |                       |
| CT830       | CTL0202      | hypothetical protein | 2             |                           |        |                       |
| CT831       | CTL0203      | murB                 | 1             |                           |        |                       |
| CT832       | CTL0204      | nusB                 | 1             |                           |        |                       |
| CT833       | CTL0205      | infC                 | 38            |                           | yes    | yes                   |
| CT836       | CTL0208      | pheS                 | 1             |                           |        |                       |
| CT837       | CTL0209      | hypothetical protein | 6             |                           |        |                       |
| CT839       | CTL0211      | hypothetical protein | 1             | putative membrane protein |        |                       |
| CT840       | CTL0212      | tijS                 | 1             |                           |        |                       |
| CT841       | CTL0213      | ftsH                 | 3             | putative membrane protein |        |                       |
| CT842       | CTL0214      | pnp                  | 4             |                           |        |                       |
| CT846       | CTL0218      | hypothetical protein | 1             | putative membrane protein |        |                       |
| CT847       | CTL0219      | hypothetical protein | 2             |                           |        |                       |
| CT848       | CTL0220      | hypothetical protein | 3             |                           |        |                       |
| CT850       | CTL0223      | hypothetical protein | 2             | putative membrane protein |        |                       |
| CT852       | CTL0225      | hypothetical protein | 12            | putative membrane protein | yes    | yes                   |
| CT853       | CTL0226      | hypothetical protein | 1             | putative membrane protein |        |                       |
| CT854       | CTL0227      | hypothetical protein | 5             | putative membrane protein |        |                       |
| CT856       | CTL0231      | hypothetical protein | 3             | putative membrane protein |        |                       |
| CT857       | CTL0232      | hypothetical protein | 1             | putative membrane protein |        |                       |
| CT858       | CTL0233      | cpa                  | 1             |                           |        |                       |
| CT859       | CTL0234      | ispH                 | 3             |                           |        |                       |
| CT860       | CTL0235      | copD2                | 6             |                           |        |                       |
| CT861       | CTL0236      | copB2                | 11            | putative membrane protein |        |                       |
| CT862       | CTL0237      | lcrH                 | 2             |                           |        |                       |
| CT863       | CTL0238      | hypothetical protein | 2             |                           |        |                       |
| CT864       | CTL0243      | xerD                 | 1             |                           |        |                       |
| CT865       | CTL0244      | hypothetical protein | 2             |                           |        |                       |
| CT866       | CTL0245      | glgB                 | 4             |                           |        |                       |
| CT867       | CTL0246      | hypothetical protein | 9             | putative membrane protein |        |                       |
| CT868       | CTL0247      | hypothetical protein | 36            | putative membrane protein | yes    | yes                   |
| CT869       | CTL0248      | pmpE                 | 14            | membrane protein          | yes    |                       |
| CT870       | CTL0249      | pmpF                 | 110           | membrane protein          | yes    |                       |
| CT871       | CTL0250      | pmpG                 | 28            | membrane protein          |        |                       |
| CT872       | CTL0251      | pmpH                 | 57            | membrane protein          | yes    |                       |
| CT873       | CTL0252      | hypothetical protein | 72            |                           | yes    | yes                   |
| CT874       | CTL0254      | pmpI                 | 3             |                           |        |                       |
| CT875       | CTL0255      | hypothetical protein | 28            |                           |        |                       |

TABLE S1. Gene products associated with attachment efficiency phenotype. D/UW3 and L2-434 gene designations, and putative membrane localization are given for gene products with amino acid changes that are associated with attachment efficiency. NS AA changes indicate the number of non-synonymous amino acid changes that are associated with attachment efficiency. Indel status indicates whether an in-frame insertion or deletion within a protein is associated with attachment efficiency. Elongation/truncation status indicated whether a protein has either an N or C-terminal truncation/elongation that is associated with attachment efficiency.
